# Supplementary material for: Identification of 15 T Cell Restricted Genes Evaluates T Cell Infiltration of Human Healthy Tissues and Cancers and Shows Prognostic and Predictive Potential
Source: MDPI journal article supplement (doi:10.3390/ijms20205242), 2019-10-22
Supplement: s1 [file s1]

Cell Lines:

|      |      |      |       |      |          |
|------|------|------|-------|------|----------|
| L1   | 5507 | L109 | HepG2 | L117 | NCI-H937 |
| L2   | 5508 | L109 | HepG2 | L118 | NCI-H937 |
| L3   | 5509 | L109 | HepG2 | L119 | NCI-H937 |
| L4   | 5510 | L109 | HepG2 | L120 | NCI-H937 |
| L5   | 5511 | L109 | HepG2 | L121 | NCI-H937 |
| L6   | 5512 | L109 | HepG2 | L122 | NCI-H937 |
| L7   | 5513 | L109 | HepG2 | L123 | NCI-H937 |
| L8   | 5514 | L109 | HepG2 | L124 | NCI-H937 |
| L9   | 5515 | L109 | HepG2 | L125 | NCI-H937 |
| L10  | 5516 | L109 | HepG2 | L126 | NCI-H937 |
| L11  | 5517 | L109 | HepG2 | L127 | NCI-H937 |
| L12  | 5518 | L109 | HepG2 | L128 | NCI-H937 |
| L13  | 5519 | L109 | HepG2 | L129 | NCI-H937 |
| L14  | 5520 | L109 | HepG2 | L130 | NCI-H937 |
| L15  | 5521 | L109 | HepG2 | L131 | NCI-H937 |
| L16  | 5522 | L109 | HepG2 | L132 | NCI-H937 |
| L17  | 5523 | L109 | HepG2 | L133 | NCI-H937 |
| L18  | 5524 | L109 | HepG2 | L134 | NCI-H937 |
| L19  | 5525 | L109 | HepG2 | L135 | NCI-H937 |
| L20  | 5526 | L109 | HepG2 | L136 | NCI-H937 |
| L21  | 5527 | L109 | HepG2 | L137 | NCI-H937 |
| L22  | 5528 | L109 | HepG2 | L138 | NCI-H937 |
| L23  | 5529 | L109 | HepG2 | L139 | NCI-H937 |
| L24  | 5530 | L109 | HepG2 | L140 | NCI-H937 |
| L25  | 5531 | L109 | HepG2 | L141 | NCI-H937 |
| L26  | 5532 | L109 | HepG2 | L142 | NCI-H937 |
| L27  | 5533 | L109 | HepG2 | L143 | NCI-H937 |
| L28  | 5534 | L109 | HepG2 | L144 | NCI-H937 |
| L29  | 5535 | L109 | HepG2 | L145 | NCI-H937 |
| L30  | 5536 | L109 | HepG2 | L146 | NCI-H937 |
| L31  | 5537 | L109 | HepG2 | L147 | NCI-H937 |
| L32  | 5538 | L109 | HepG2 | L148 | NCI-H937 |
| L33  | 5539 | L109 | HepG2 | L149 | NCI-H937 |
| L34  | 5540 | L109 | HepG2 | L150 | NCI-H937 |
| L35  | 5541 | L109 | HepG2 | L151 | NCI-H937 |
| L36  | 5542 | L109 | HepG2 | L152 | NCI-H937 |
| L37  | 5543 | L109 | HepG2 | L153 | NCI-H937 |
| L38  | 5544 | L109 | HepG2 | L154 | NCI-H937 |
| L39  | 5545 | L109 | HepG2 | L155 | NCI-H937 |
| L40  | 5546 | L109 | HepG2 | L156 | NCI-H937 |
| L41  | 5547 | L109 | HepG2 | L157 | NCI-H937 |
| L42  | 5548 | L109 | HepG2 | L158 | NCI-H937 |
| L43  | 5549 | L109 | HepG2 | L159 | NCI-H937 |
| L44  | 5550 | L109 | HepG2 | L160 | NCI-H937 |
| L45  | 5551 | L109 | HepG2 | L161 | NCI-H937 |
| L46  | 5552 | L109 | HepG2 | L162 | NCI-H937 |
| L47  | 5553 | L109 | HepG2 | L163 | NCI-H937 |
| L48  | 5554 | L109 | HepG2 | L164 | NCI-H937 |
| L49  | 5555 | L109 | HepG2 | L165 | NCI-H937 |
| L50  | 5556 | L109 | HepG2 | L166 | NCI-H937 |
| L51  | 5557 | L109 | HepG2 | L167 | NCI-H937 |
| L52  | 5558 | L109 | HepG2 | L168 | NCI-H937 |
| L53  | 5559 | L109 | HepG2 | L169 | NCI-H937 |
| L54  | 5560 | L109 | HepG2 | L170 | NCI-H937 |
| L55  | 5561 | L109 | HepG2 | L171 | NCI-H937 |
| L56  | 5562 | L109 | HepG2 | L172 | NCI-H937 |
| L57  | 5563 | L109 | HepG2 | L173 | NCI-H937 |
| L58  | 5564 | L109 | HepG2 | L174 | NCI-H937 |
| L59  | 5565 | L109 | HepG2 | L175 | NCI-H937 |
| L60  | 5566 | L109 | HepG2 | L176 | NCI-H937 |
| L61  | 5567 | L109 | HepG2 | L177 | NCI-H937 |
| L62  | 5568 | L109 | HepG2 | L178 | NCI-H937 |
| L63  | 5569 | L109 | HepG2 | L179 | NCI-H937 |
| L64  | 5570 | L109 | HepG2 | L180 | NCI-H937 |
| L65  | 5571 | L109 | HepG2 | L181 | NCI-H937 |
| L66  | 5572 | L109 | HepG2 | L182 | NCI-H937 |
| L67  | 5573 | L109 | HepG2 | L183 | NCI-H937 |
| L68  | 5574 | L109 | HepG2 | L184 | NCI-H937 |
| L69  | 5575 | L109 | HepG2 | L185 | NCI-H937 |
| L70  | 5576 | L109 | HepG2 | L186 | NCI-H937 |
| L71  | 5577 | L109 | HepG2 | L187 | NCI-H937 |
| L72  | 5578 | L109 | HepG2 | L188 | NCI-H937 |
| L73  | 5579 | L109 | HepG2 | L189 | NCI-H937 |
| L74  | 5580 | L109 | HepG2 | L190 | NCI-H937 |
| L75  | 5581 | L109 | HepG2 | L191 | NCI-H937 |
| L76  | 5582 | L109 | HepG2 | L192 | NCI-H937 |
| L77  | 5583 | L109 | HepG2 | L193 | NCI-H937 |
| L78  | 5584 | L109 | HepG2 | L194 | NCI-H937 |
| L79  | 5585 | L109 | HepG2 | L195 | NCI-H937 |
| L80  | 5586 | L109 | HepG2 | L196 | NCI-H937 |
| L81  | 5587 | L109 | HepG2 | L197 | NCI-H937 |
| L82  | 5588 | L109 | HepG2 | L198 | NCI-H937 |
| L83  | 5589 | L109 | HepG2 | L199 | NCI-H937 |
| L84  | 5590 | L109 | HepG2 | L200 | NCI-H937 |
| L85  | 5591 | L109 | HepG2 | L201 | NCI-H937 |
| L86  | 5592 | L109 | HepG2 | L202 | NCI-H937 |
| L87  | 5593 | L109 | HepG2 | L203 | NCI-H937 |
| L88  | 5594 | L109 | HepG2 | L204 | NCI-H937 |
| L89  | 5595 | L109 | HepG2 | L205 | NCI-H937 |
| L90  | 5596 | L109 | HepG2 | L206 | NCI-H937 |
| L91  | 5597 | L109 | HepG2 | L207 | NCI-H937 |
| L92  | 5598 | L109 | HepG2 | L208 | NCI-H937 |
| L93  | 5599 | L109 | HepG2 | L209 | NCI-H937 |
| L94  | 5600 | L109 | HepG2 | L210 | NCI-H937 |
| L95  | 5601 | L109 | HepG2 | L211 | NCI-H937 |
| L96  | 5602 | L109 | HepG2 | L212 | NCI-H937 |
| L97  | 5603 | L109 | HepG2 | L213 | NCI-H937 |
| L98  | 5604 | L109 | HepG2 | L214 | NCI-H937 |
| L99  | 5605 | L109 | HepG2 | L215 | NCI-H937 |
| L100 | 5606 | L109 | HepG2 | L216 | NCI-H937 |
| L101 | 5607 | L109 | HepG2 | L217 | NCI-H937 |
| L102 | 5608 | L109 | HepG2 | L218 | NCI-H937 |
| L103 | 5609 | L109 | HepG2 | L219 | NCI-H937 |
| L104 | 5610 | L109 | HepG2 | L220 | NCI-H937 |
| L105 | 5611 | L109 | HepG2 | L221 | NCI-H937 |
| L106 | 5612 | L109 | HepG2 | L222 | NCI-H937 |
| L107 | 5613 | L109 | HepG2 | L223 | NCI-H937 |
| L108 | 5614 | L109 | HepG2 | L224 | NCI-H937 |
| L109 | 5615 | L109 | HepG2 | L225 | NCI-H937 |
| L110 | 5616 | L109 | HepG2 | L226 | NCI-H937 |
| L111 | 5617 | L109 | HepG2 | L227 | NCI-H937 |
| L112 | 5618 | L109 | HepG2 | L228 | NCI-H937 |
| L113 | 5619 | L109 | HepG2 | L229 | NCI-H937 |
| L114 | 5620 | L109 | HepG2 | L230 | NCI-H937 |
| L115 | 5621 | L109 | HepG2 | L231 | NCI-H937 |
| L116 | 5622 | L109 | HepG2 | L232 | NCI-H937 |
| L117 | 5623 | L109 | HepG2 | L233 | NCI-H937 |
| L118 | 5624 | L109 | HepG2 | L234 | NCI-H937 |
| L119 | 5625 | L109 | HepG2 | L235 | NCI-H937 |
| L120 | 5626 | L109 | HepG2 | L236 | NCI-H937 |
| L121 | 5627 | L109 | HepG2 | L237 | NCI-H937 |
| L122 | 5628 | L109 | HepG2 | L238 | NCI-H937 |
| L123 | 5629 | L109 | HepG2 | L239 | NCI-H937 |
| L124 | 5630 | L109 | HepG2 | L240 | NCI-H937 |
| L125 | 5631 | L109 | HepG2 | L241 | NCI-H937 |
| L126 | 5632 | L109 | HepG2 | L242 | NCI-H937 |
| L127 | 5633 | L109 | HepG2 | L243 | NCI-H937 |
| L128 | 5634 | L109 | HepG2 | L244 | NCI-H937 |
| L129 | 5635 | L109 | HepG2 | L245 | NCI-H937 |
| L130 | 5636 | L109 | HepG2 | L246 | NCI-H937 |
| L131 | 5637 | L109 | HepG2 | L247 | NCI-H937 |
| L132 | 5638 | L109 | HepG2 | L248 | NCI-H937 |
| L133 | 5639 | L109 | HepG2 | L249 | NCI-H937 |
| L134 | 5640 | L109 | HepG2 | L250 | NCI-H937 |
| L135 | 5641 | L109 | HepG2 | L251 | NCI-H937 |
| L136 | 5642 | L109 | HepG2 | L252 | NCI-H937 |
| L137 | 5643 | L109 | HepG2 | L253 | NCI-H937 |
| L138 | 5644 | L109 | HepG2 | L254 | NCI-H937 |
| L139 | 5645 | L109 | HepG2 | L255 | NCI-H937 |
| L140 | 5646 | L109 | HepG2 | L256 | NCI-H937 |
| L141 | 5647 | L109 | HepG2 | L257 | NCI-H937 |
| L142 | 5648 | L109 | HepG2 | L258 | NCI-H937 |
| L143 | 5649 | L109 | HepG2 | L259 | NCI-H937 |
| L144 | 5650 | L109 | HepG2 | L260 | NCI-H937 |
| L145 | 5651 | L109 | HepG2 | L261 | NCI-H937 |
| L146 | 5652 | L109 | HepG2 | L262 | NCI-H937 |
| L147 | 5653 | L109 | HepG2 | L263 | NCI-H937 |
| L148 | 5654 | L109 | HepG2 | L264 | NCI-H937 |
| L149 | 5655 | L109 | HepG2 | L265 | NCI-H937 |
| L150 | 5656 | L109 | HepG2 | L266 | NCI-H937 |
| L151 | 5657 | L109 | HepG2 | L267 | NCI-H937 |
| L152 | 5658 | L109 | HepG2 | L268 | NCI-H937 |
| L153 | 5659 | L109 | HepG2 | L269 | NCI-H937 |
| L154 | 5660 | L109 | HepG2 | L270 | NCI-H937 |
| L155 | 5661 | L109 | HepG2 | L271 | NCI-H937 |
| L156 | 5662 | L109 | HepG2 | L272 | NCI-H937 |
| L157 | 5663 | L109 | HepG2 | L273 | NCI-H937 |
| L158 | 5664 | L109 | HepG2 | L274 | NCI-H937 |
| L159 | 5665 | L109 | HepG2 | L275 | NCI-H937 |
| L160 | 5666 | L109 | HepG2 | L276 | NCI-H937 |
| L161 | 5667 | L109 | HepG2 | L277 | NCI-H937 |
| L162 | 5668 | L109 | HepG2 | L278 | NCI-H937 |
| L163 | 5669 | L109 | HepG2 | L279 | NCI-H937 |
| L164 | 5670 | L109 | HepG2 | L280 | NCI-H937 |
| L165 | 5671 | L109 | HepG2 | L281 | NCI-H937 |
| L166 | 5672 | L109 | HepG2 | L282 | NCI-H937 |
| L167 | 5673 | L109 | HepG2 | L283 | NCI-H937 |
| L168 | 5674 | L109 | HepG2 | L284 | NCI-H937 |
| L169 | 5675 | L109 | HepG2 | L285 | NCI-H937 |
| L170 | 5676 | L109 | HepG2 | L286 | NCI-H937 |
| L171 | 5677 | L109 | HepG2 | L287 | NCI-H937 |
| L172 | 5678 | L109 | HepG2 | L288 | NCI-H937 |
| L173 | 5679 | L109 | HepG2 | L289 | NCI-H937 |
| L174 | 5680 | L109 | HepG2 | L290 | NCI-H937 |
| L175 | 5681 | L109 | HepG2 | L291 | NCI-H937 |
| L176 | 5682 | L109 | HepG2 | L292 | NCI-H937 |
| L177 | 5683 | L109 | HepG2 | L293 | NCI-H937 |
| L178 | 5684 | L109 | HepG2 | L294 | NCI-H937 |
| L179 | 5685 | L109 | HepG2 | L295 | NCI-H937 |
| L180 | 5686 | L109 | HepG2 | L296 | NCI-H937 |
| L181 | 5687 | L109 | HepG2 | L297 | NCI-H937 |
| L182 | 5688 | L109 | HepG2 | L298 | NCI-H937 |
| L183 | 5689 | L109 | HepG2 | L299 | NCI-H937 |
| L184 | 5690 | L109 | HepG2 | L300 | NCI-H937 |
| L185 | 5691 | L109 | HepG2 | L301 | NCI-H937 |
| L186 | 5692 | L109 | HepG2 | L302 | NCI-H937 |
| L187 | 5693 | L109 | HepG2 | L303 | NCI-H937 |
| L188 | 5694 | L109 | HepG2 | L304 | NCI-H937 |
| L189 | 5695 | L109 | HepG2 | L305 | NCI-H937 |
| L190 | 5696 | L109 | HepG2 | L306 | NCI-H937 |
| L191 | 5697 | L109 | HepG2 | L307 | NCI-H937 |
| L192 | 5698 | L109 | HepG2 | L308 | NCI-H937 |
| L193 | 5699 | L109 | HepG2 | L309 | NCI-H937 |
| L194 | 5700 | L109 | HepG2 | L310 | NCI-H937 |
| L195 | 5701 | L109 | HepG2 | L311 | NCI-H937 |
| L196 | 5702 | L109 | HepG2 | L312 | NCI-H937 |
| L197 | 5703 | L109 | HepG2 | L313 | NCI-H937 |
| L198 | 5704 | L109 | HepG2 | L314 | NCI-H937 |
| L199 | 5705 | L109 | HepG2 | L315 | NCI-H937 |
| L200 | 5706 | L109 | HepG2 | L316 | NCI-H937 |
| L201 | 5707 | L109 | HepG2 | L317 | NCI-H937 |
| L202 | 5708 | L109 | HepG2 | L318 | NCI-H937 |
| L203 | 5709 | L109 | HepG2 | L319 | NCI-H937 |
| L204 | 5710 | L109 | HepG2 | L320 | NCI-H937 |
| L205 | 5711 | L109 | HepG2 | L321 | NCI-H937 |
| L206 | 5712 | L109 | HepG2 | L322 | NCI-H937 |
| L207 | 5713 | L109 | HepG2 | L323 | NCI-H937 |
| L208 | 5714 | L109 | HepG2 | L324 | NCI-H937 |
| L209 | 5715 | L109 | HepG2 | L325 | NCI-H937 |
| L210 | 5716 | L109 | HepG2 | L326 | NCI-H937 |
| L211 | 5717 | L109 | HepG2 | L327 | NCI-H937 |
| L212 | 5718 | L109 | HepG2 | L328 | NCI-H937 |
| L213 | 5719 | L109 | HepG2 | L329 | NCI-H937 |
| L214 | 5720 | L109 | HepG2 | L330 | NCI-H937 |
| L215 | 5721 | L109 | HepG2 | L331 | NCI-H937 |
| L216 | 5722 | L109 | HepG2 | L332 | NCI-H937 |
| L217 | 5723 | L109 | HepG2 | L333 | NCI-H937 |
| L218 | 5724 | L109 | HepG2 | L334 | NCI-H937 |
| L219 | 5725 | L109 | HepG2 | L335 | NCI-H937 |
| L220 | 5726 | L109 | HepG2 | L336 | NCI-H937 |
| L221 | 5727 | L109 | HepG2 | L337 | NCI-H937 |
| L222 | 5728 | L109 | HepG2 | L338 | NCI-H937 |
|      |      |      |       |      |          |
