# Supplementary material for: Identification of 15 T Cell Restricted Genes Evaluates T Cell Infiltration of Human Healthy Tissues and Cancers and Shows Prognostic and Predictive Potential
Source: MDPI journal article supplement (doi:10.3390/ijms20205242), 2019-10-22
Supplement: s1 [file s1]

A

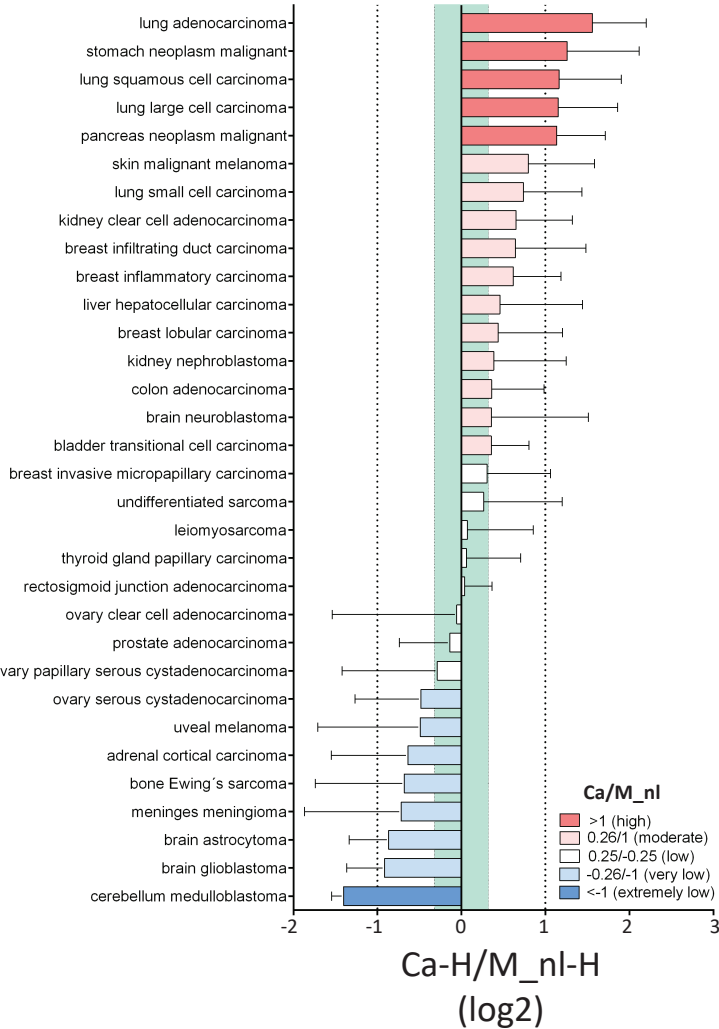

B

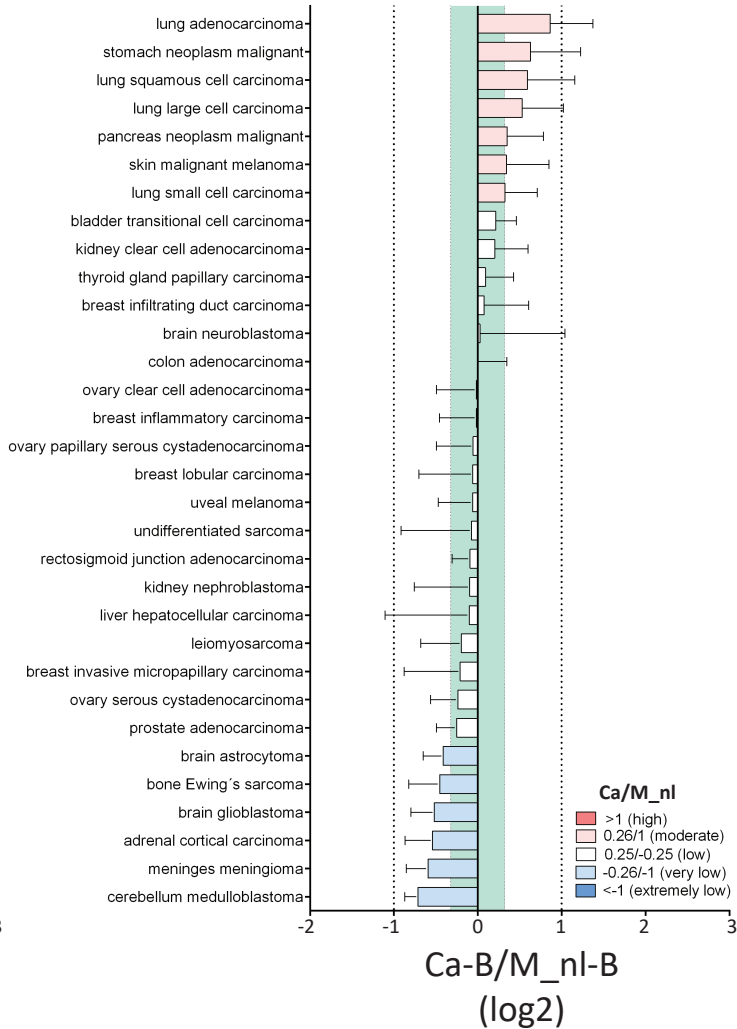

C

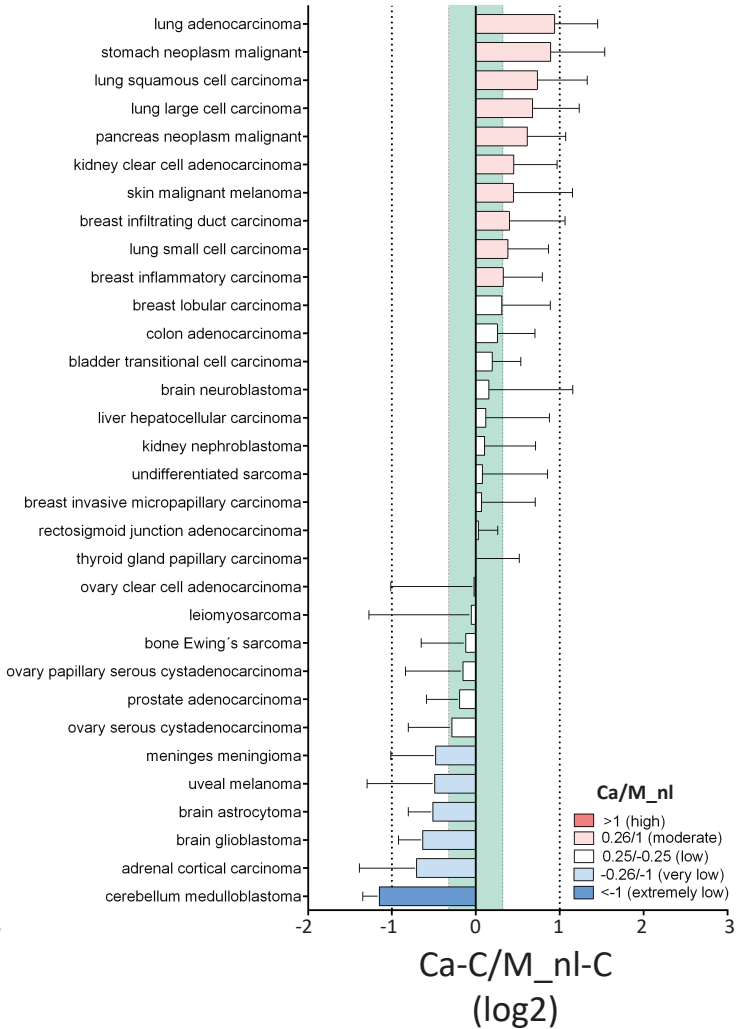

**Figure S6: Ts% of 32 types of cancers evaluated using signatures H, B, and C**

The mean±1SD expression of the genes in signature-H (panel A), signature-B (panel B), and signature-C (panel C) in 32 types of cancers (Ca<sub>H</sub>, Ca<sub>B</sub>, Ca<sub>C</sub>) and the mean expression of the genes in non-lymphoid tissues (M<sub>nl</sub>-H, M<sub>nl</sub>-B, M<sub>nl</sub>-C) were calculated. Then, the difference between the mean±1SD expression of the signature genes in each cancer and the mean expression of the genes in non-lymphoid tissues (Ca<sub>H</sub>/M<sub>nl</sub>-H, Ca<sub>B</sub>/M<sub>nl</sub>-B, Ca<sub>C</sub>/M<sub>nl</sub>-C) was calculated.

If a cancer specimen showed a Ca/M<sub>nl</sub> value between 0.25 and -0.25log<sub>2</sub> (that is a T cell expression level between 80% and 125% of M<sub>nl</sub>)(green area), it was considered to have a similar low infiltration level as the corresponding non-lymphoid tissue (white bars). If a cancer showed a Ca/M<sub>nl</sub> value between 0.26 and 1log<sub>2</sub> (that is a T cell expression level between 125% and 200% of M<sub>nl</sub>), it was considered to be infiltrated by T cells at moderate levels (pink bars). If a cancer showed a value Ca/M<sub>nl</sub> above 1log<sub>2</sub> (that is a T cell expression level above 200% of M<sub>nl</sub>), it was considered to be infiltrated by T cells at high levels (red bars). If a cancer showed a Ca/M<sub>nl</sub> value between -1 and -0.26log<sub>2</sub> (that is a T cell expression level between 50% and 80% of M<sub>nl</sub>), it was considered to be infiltrated by T cells at very low levels (light blue bars). If a cancer showed a Ca/M<sub>nl</sub> value below -1log<sub>2</sub> (that is a T cell expression level below 50% of M<sub>nl</sub>), it was considered to be infiltrated by T cells at extremely low levels (blue bars).
