# Supplementary material for: Identification of 15 T Cell Restricted Genes Evaluates T Cell Infiltration of Human Healthy Tissues and Cancers and Shows Prognostic and Predictive Potential
Source: MDPI journal article supplement (doi:10.3390/ijms20205242), 2019-10-22
Supplement: s1 [file s1]

Tissues:

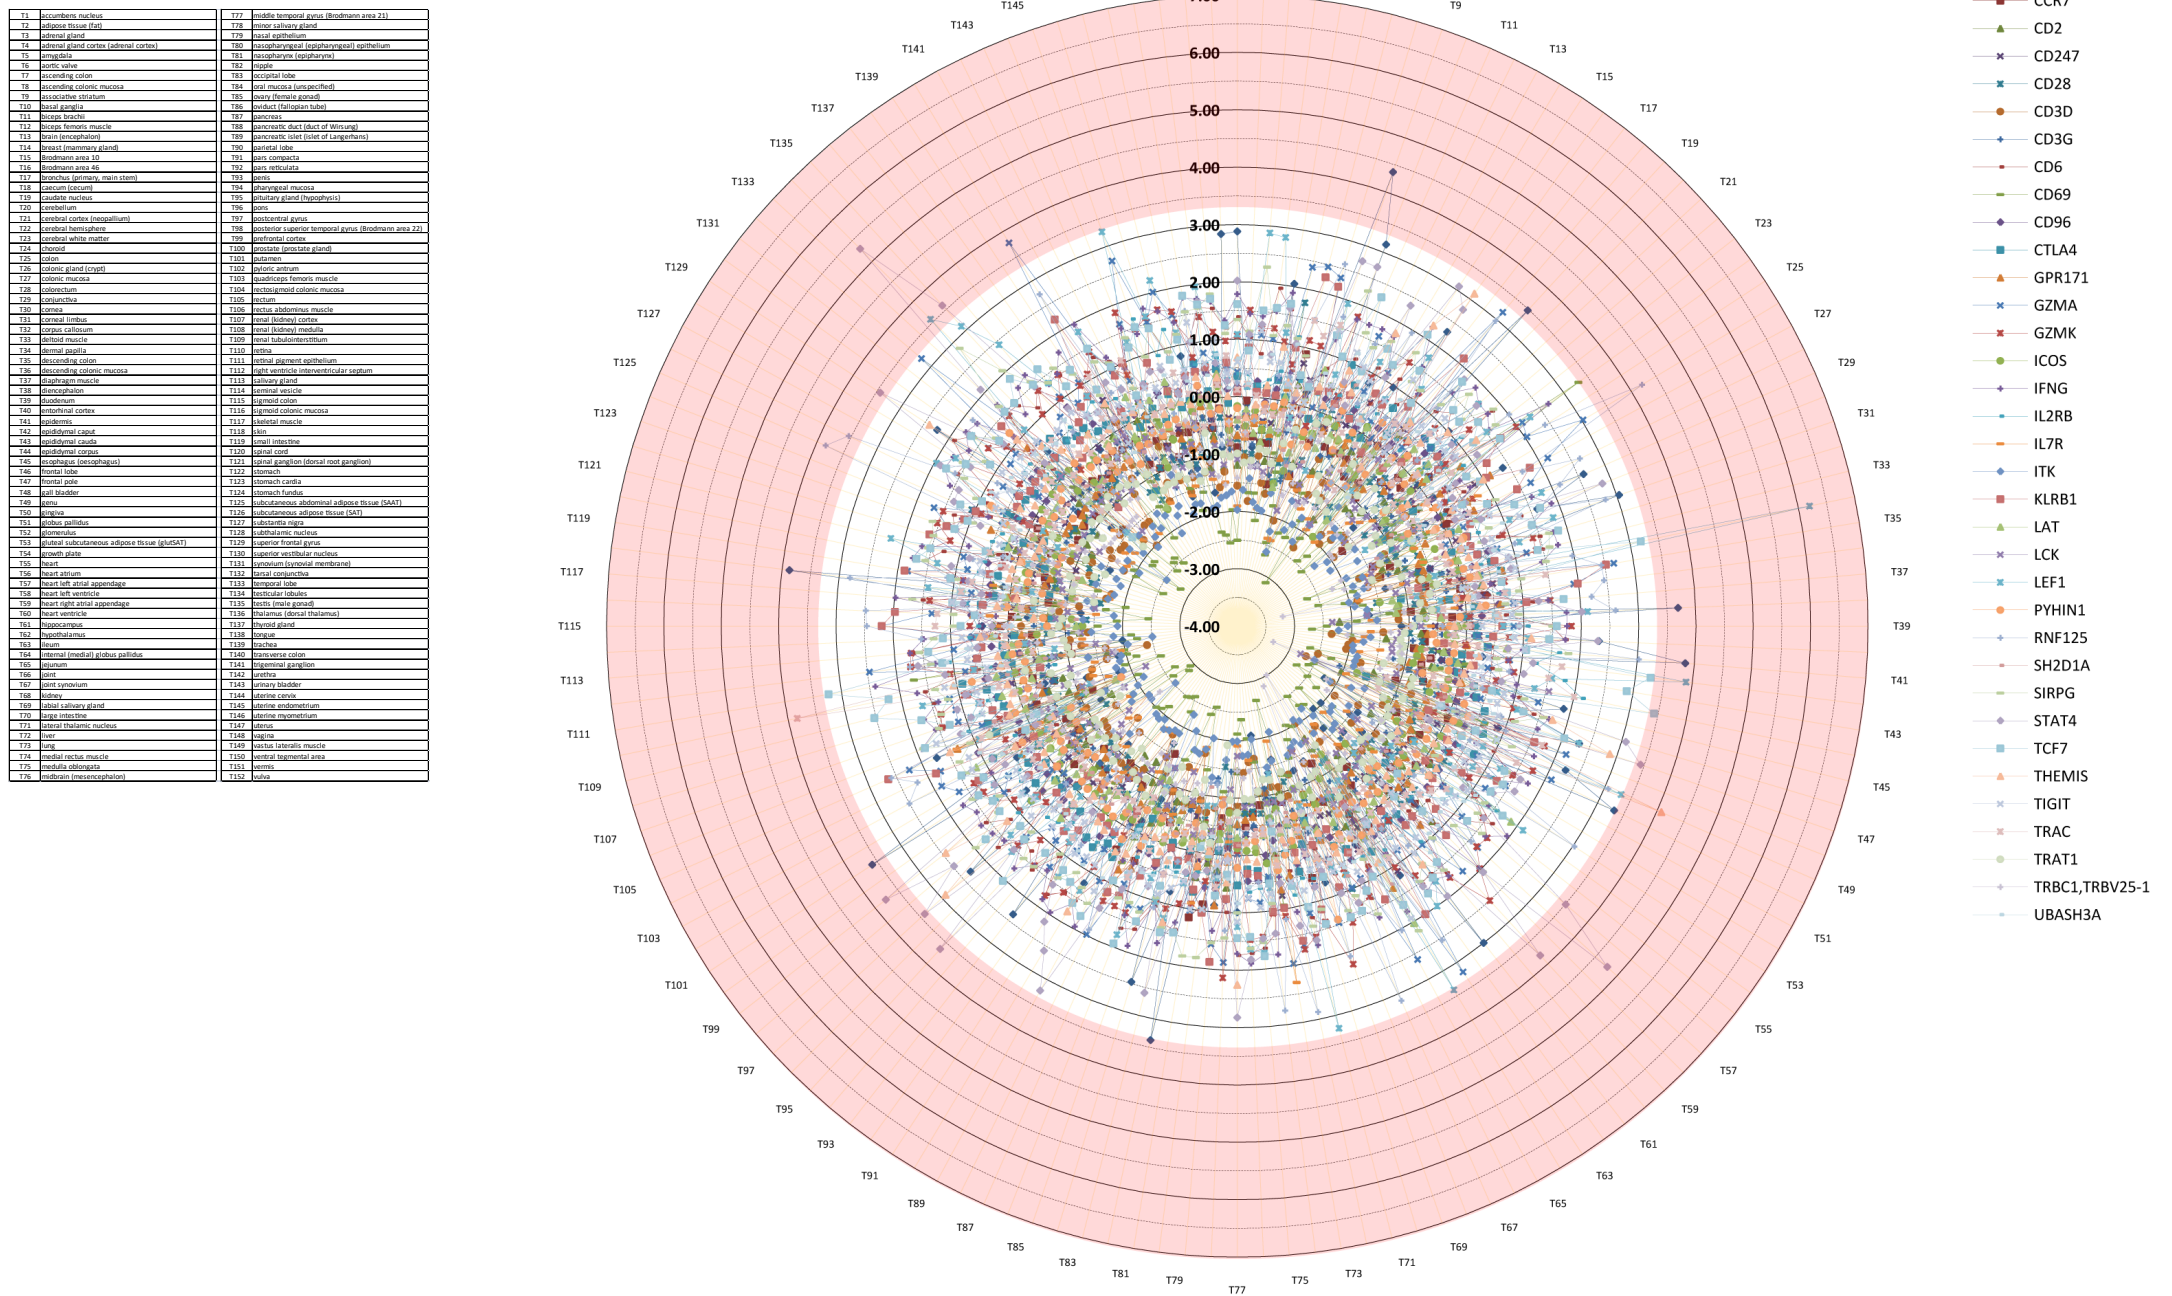

**Figure S4: Exclusion of genes from the T-cell signature (round 4)**

The expression of each gene by each of the 152 human non-lymphoid tissue (nl) and the mean expression of each gene by purified untouched/activated T cells (Tc) were expressed as log2. Then, the difference between expression in each non-lymphoid tissue and mean T-cell expression (nl/Tc) was evaluated, and the mean of nl/Tc (M\_nl/Tc) was calculated for each tissue. The cut-off for the difference between nl/Tc and M\_nl/Tc ( $[nl/Tc]/[M\_nl/Tc]$ ) of each gene was set as  $3.32\log_2$  (representing a tenfold difference). If the (nl/Tc)/(M\_nl/Tc) value for a gene was more than  $3.32\log_2$  (red region of the graph) for at least for two tissues (we chose two instead of one tissue to avoid technical artifacts or peculiarity concerning just one tissue), it was excluded.
