# Supplementary material for: Identification of 15 T Cell Restricted Genes Evaluates T Cell Infiltration of Human Healthy Tissues and Cancers and Shows Prognostic and Predictive Potential
Source: MDPI journal article supplement (doi:10.3390/ijms20205242), 2019-10-22
Supplement: s1 [file s1]

A

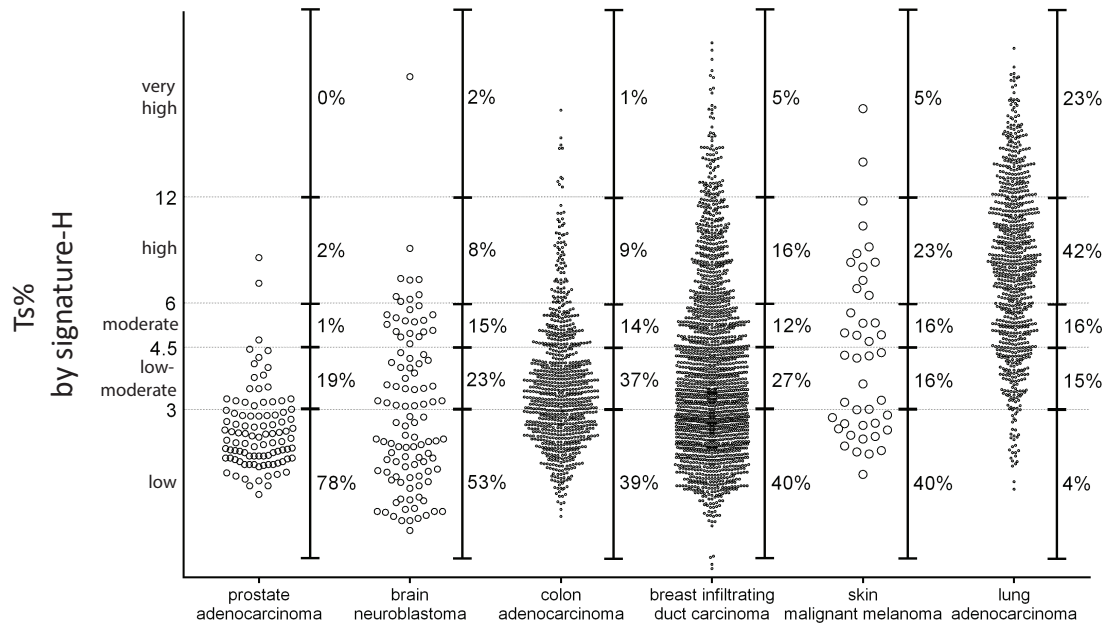

B

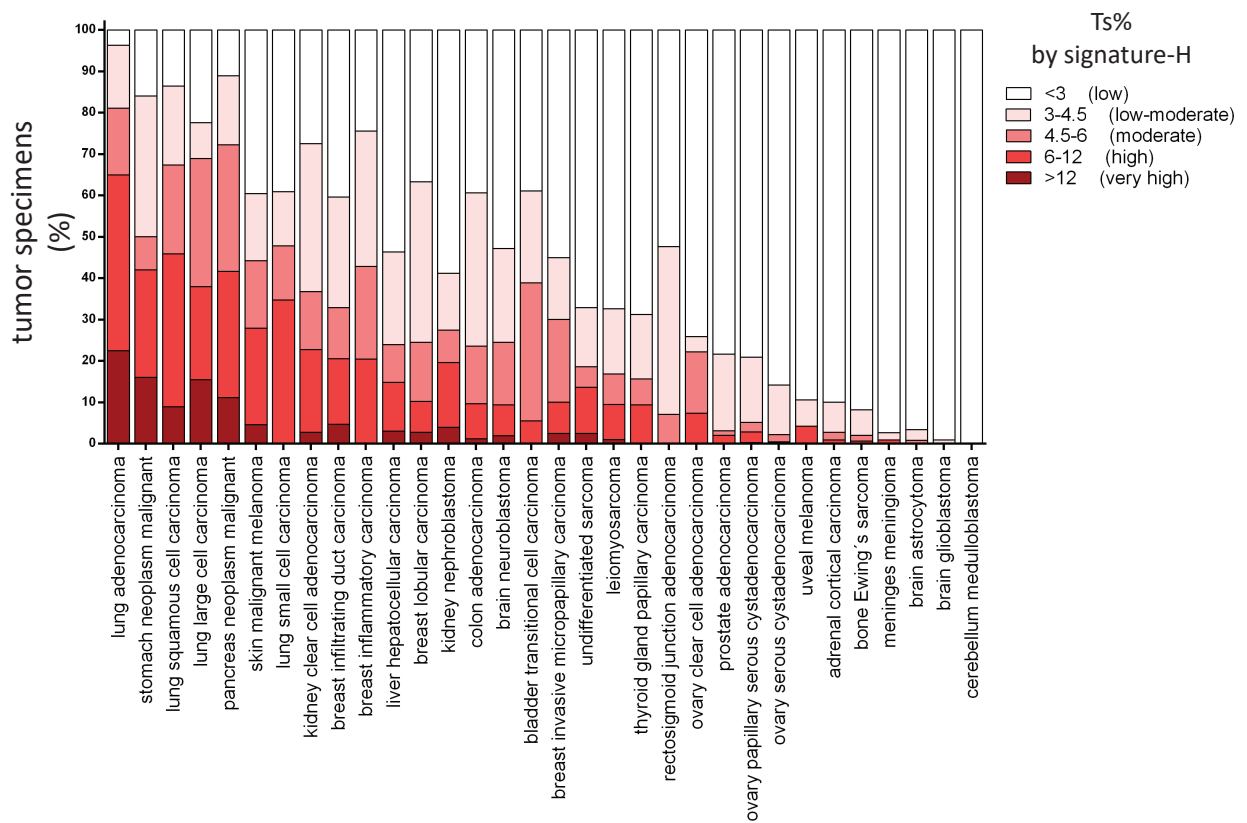

**Figure S7. Tci score % of cancer specimens from patients evaluated using signature-H**

**(A)** Tci score % (Ts%) of cancer specimens from patients for six types of cancers. The expression of genes of signature-H in 32 types of cancers in each cancer specimen was divided by the mean expression of the genes in T cells, and the expression of genes of signature-H was expressed as a percentage. The percentage of specimens with low, low-moderate, moderate, high, and very high Ts% is reported for each cancer and the percentage of patients in each Ts% category is shown on the right.

**(B)** The percentage of specimens with low, low-moderate, moderate, high, and very high Ts% according to signature-H is reported for 32 types of cancer.
