# Supplementary material for: Identification of 15 T Cell Restricted Genes Evaluates T Cell Infiltration of Human Healthy Tissues and Cancers and Shows Prognostic and Predictive Potential
Source: MDPI journal article supplement (doi:10.3390/ijms20205242), 2019-10-22
Supplement: s1 [file s1]

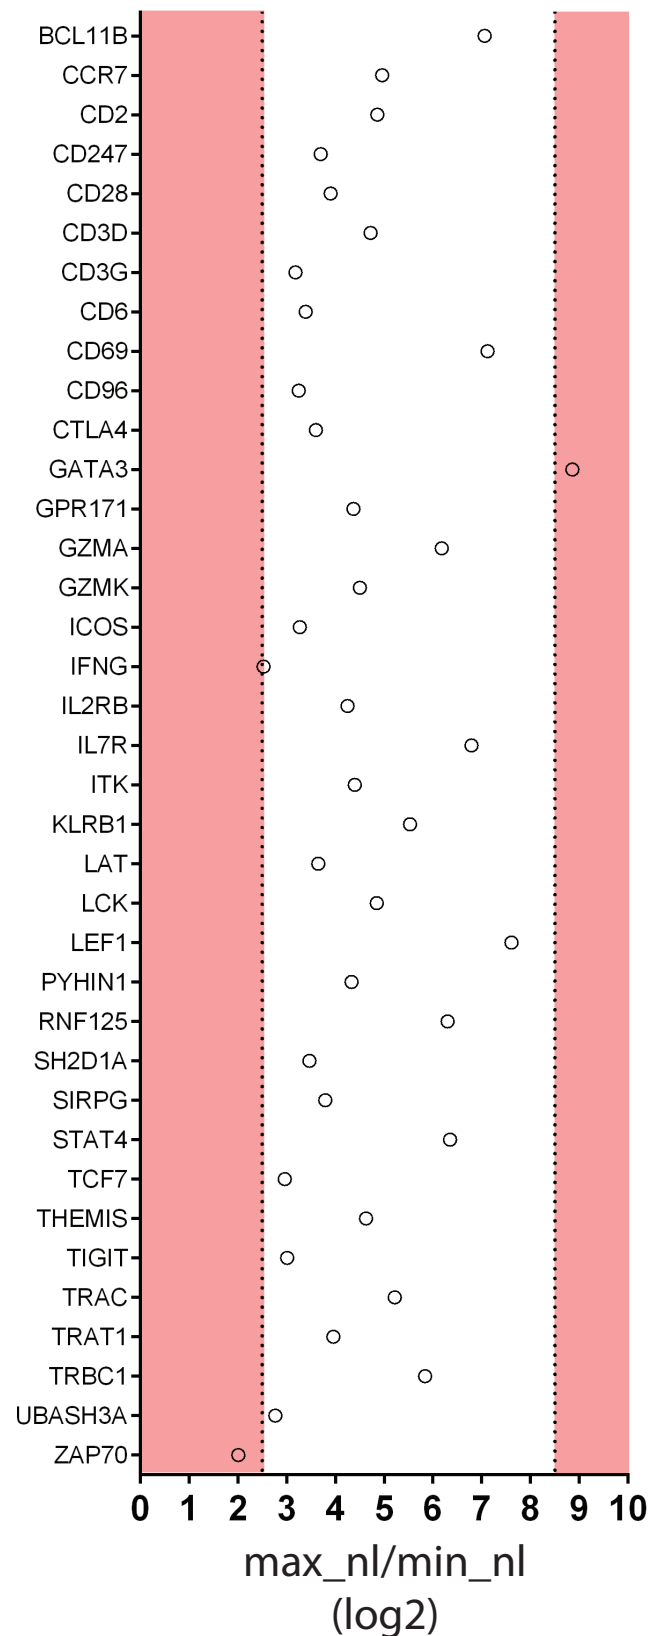

**Figure S3: Exclusion of genes from the T-cell signature (round 3)**

The expression of each gene by each of the 152 human non-lymphoid tissue (nl) was expressed as log2. Then, the difference between the maximum (max\_nl) and the minimum (min\_nl) expression level of each gene (max\_nl/min\_nl) was calculated.

We determined that for a gene to be included in the signature, the difference between the maximum and the minimum expression level of each gene (max\_nl/min\_nl) should be at least 2.5log2 (5.7-fold) and no more than 8.5log2 (362-fold) (a maximum range of 6log2 corresponds to a 64-fold difference between the max\_nl and the min\_nl). Thus, genes were excluded if their max\_nl/min\_nl ratio was <2.5 or >8.5log2 (red regions of the graph).
