# Supplementary material for: Identification of 15 T Cell Restricted Genes Evaluates T Cell Infiltration of Human Healthy Tissues and Cancers and Shows Prognostic and Predictive Potential
Source: MDPI journal article supplement (doi:10.3390/ijms20205242), 2019-10-22
Supplement: s1 [file s1]

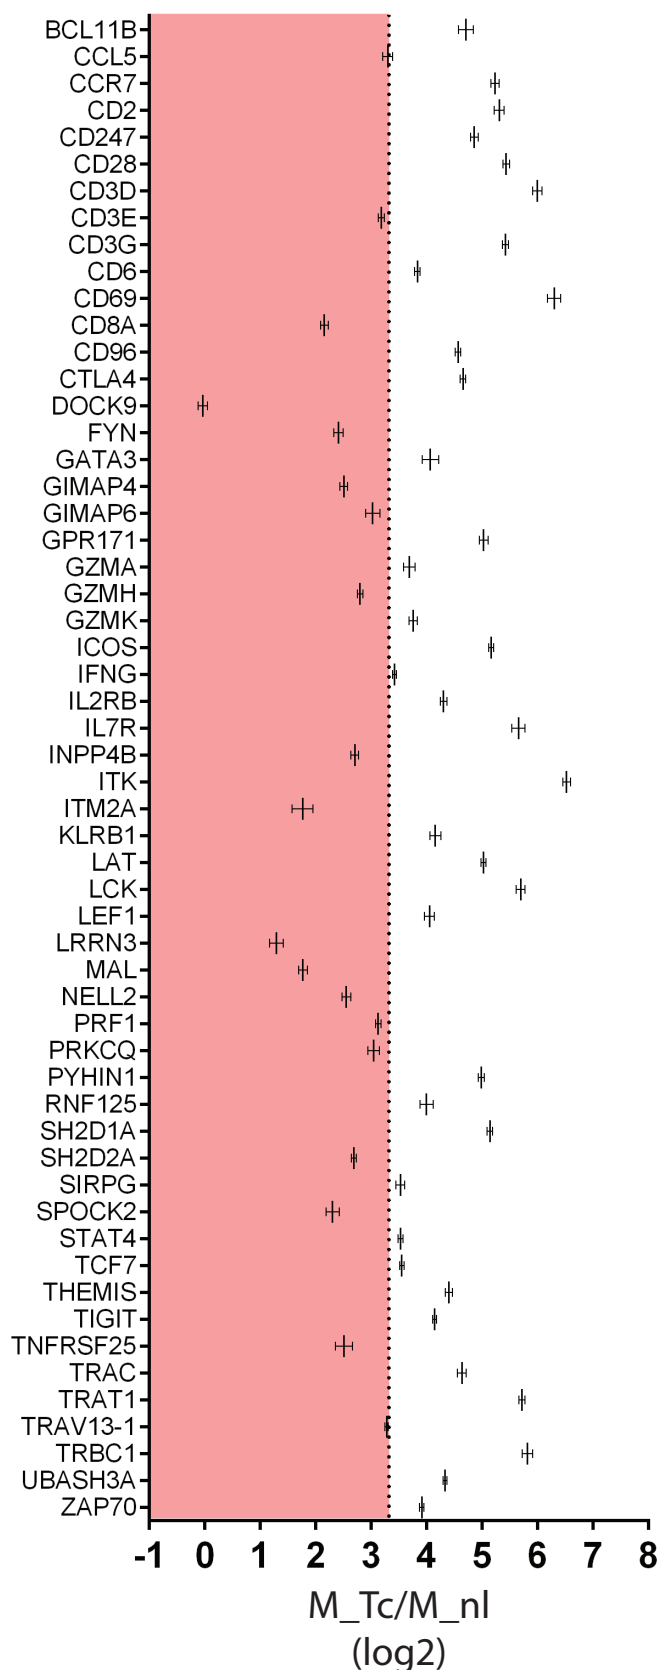

**Figure S2: Exclusion of genes from the T-cell signature (round 2)**

Mean gene expression by purified untouched/activated T cells (M<sub>Tc</sub>) and mean gene expression  $\pm$ SE by 152 human non-lymphoid tissues (M<sub>nl</sub>) were expressed as log<sub>2</sub>. The difference between mean T cell expression levels and mean non-lymphoid tissue expression levels (M<sub>Tc</sub>/M<sub>nl</sub>) is shown as mean+1SE. If the difference was less than 3.32log<sub>2</sub> (red region of the graph, corresponding to a gene overexpressed by T cells by less than tenfold), the gene was excluded from the signature.
